# Supplementary material for: Transcriptome analysis of adipose tissue from pigs divergent in feed efficiency reveals alteration in gene networks related to adipose growth, lipid metabolism, extracellular matrix, and immune response
Source: Springer Nature journal article supplement (doi:10.1007/s00438-018-1515-5), 2018-11-27
Supplement: 438_2018_1515_MOESM1_ESM.pdf [file 438_2018_1515_MOESM1_ESM.pdf]

Article title: Transcriptome analysis of adipose tissue from pigs divergent in feed efficiency reveals alteration in gene networks related to adipose growth, lipid metabolism, extracellular matrix and immune response

Journal name: Molecular Genetics and Genomics

Authors: Justyna Horodyska<sup>1,2</sup>, Henry Reyer<sup>2</sup>, Klaus Wimmers<sup>2,3</sup>, Nares Trakooljul<sup>2</sup>, Peadar G. Lawlor<sup>4</sup>, Ruth M. Hamill<sup>1\*</sup>

<sup>1</sup>Teagasc, Food Research Centre, Ashtown, Dublin 15, Ireland

<sup>2</sup>Leibniz Institute for Farm Animal Biology (FBN), Institute for Genome Biology, Dummerstorf, Germany

<sup>3</sup>Faculty of Agricultural and Environmental Sciences, University Rostock, Germany

<sup>4</sup>Teagasc, Pig Development Department, AGRIC, Moorepark, Fermoy, Co. Cork, Ireland

\*Corresponding author: Ruth.Hamill@teagasc.ie

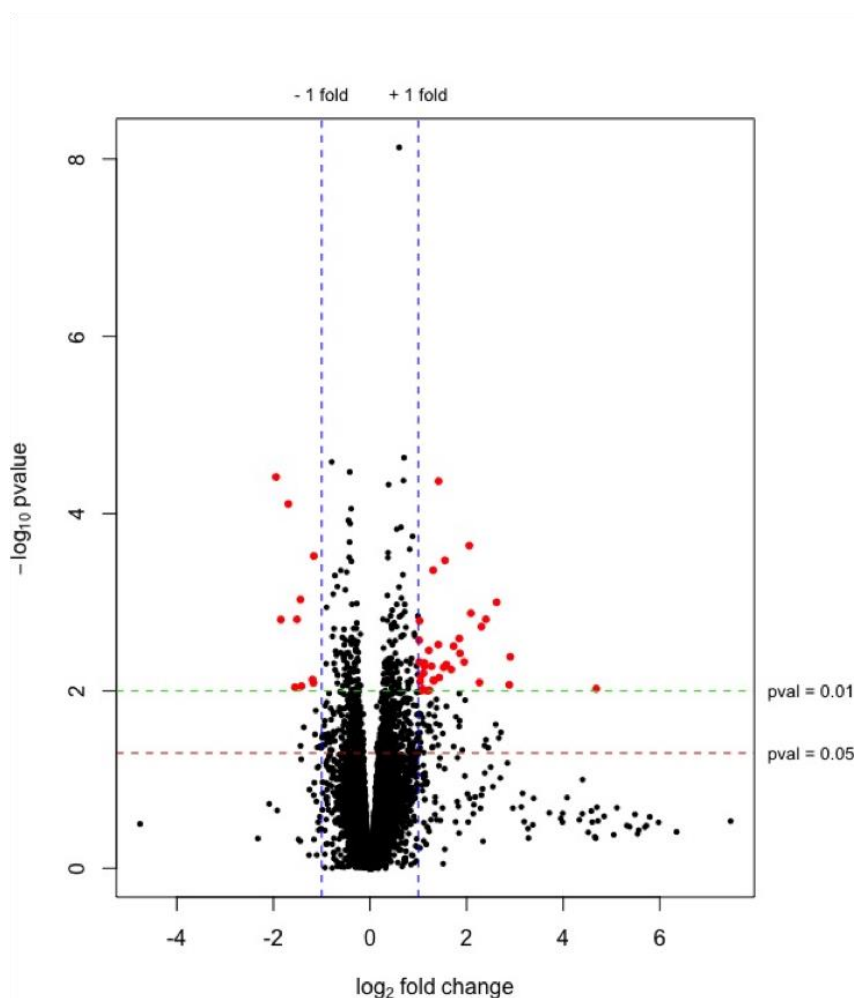

**Fig S1** Volcano plot representing log<sub>2</sub> fold changes and -log<sub>10</sub>(p-values) of genes expressed in adipose tissue from high-FE pigs. The lines indicate suggestive significance threshold at  $P < 0.01$  (green line), at  $P < 0.05$  (red line) and threshold of log<sub>2</sub> fold change  $\geq |1|$  (fold change  $\geq |2|$ ; blue lines). Red dots depict significantly differentially expressed genes at  $P < 0.01$  and log<sub>2</sub> fold change  $\geq |1|$  (fold change  $\geq |2|$ ). Positive and negative fold changes refer to up- and down-regulated genes in high-FE pigs, respectively.
