# Supplementary material for: Transcriptome analysis of adipose tissue from pigs divergent in feed efficiency reveals alteration in gene networks related to adipose growth, lipid metabolism, extracellular matrix, and immune response
Source: Springer Nature journal article supplement (doi:10.1007/s00438-018-1515-5), 2018-11-27
Supplement: 438_2018_1515_MOESM2_ESM.pdf [file 438_2018_1515_MOESM2_ESM.pdf]

Article title: Transcriptome analysis of adipose tissue from pigs divergent in feed efficiency reveals alteration in gene networks related to adipose growth, lipid metabolism, extracellular matrix and immune response

Journal name: Molecular Genetics and Genomics

Authors: Justyna Horodyska<sup>1,2</sup>, Henry Reyer<sup>2</sup>, Klaus Wimmers<sup>2,3</sup>, Nares Trakooljul<sup>2</sup>, Peadar G. Lawlor<sup>4</sup>, Ruth M. Hamill<sup>1\*</sup>

<sup>1</sup>Teagasc, Food Research Centre, Ashtown, Dublin 15, Ireland

<sup>2</sup>Leibniz Institute for Farm Animal Biology (FBN), Institute for Genome Biology, Dummerstorf, Germany

<sup>3</sup>Faculty of Agricultural and Environmental Sciences, University Rostock, Germany

<sup>4</sup>Teagasc, Pig Development Department, AGRIC, Moorepark, Fermoy, Co. Cork, Ireland

\*Corresponding author: Ruth.Hamill@teagasc.ie

**Table S1** Differentially expressed transcripts (n = 209) at a P < 0.01 in FE-divergent pigs.

| Gene Symbol | Gene Name                                               | Fold Change | p-value | q-value | Networks* |
|-------------|---------------------------------------------------------|-------------|---------|---------|-----------|
| COL11A2     | collagen type XI alpha 2 chain                          | 25.7        | 0.009   | 0.638   | 2         |
| PLEKHB1     | pleckstrin homology domain containing B1                | 7.49        | 0.004   | 0.548   | 3         |
| DIRAS3      | DIRAS family GTPase 3                                   | 7.37        | 0.009   | 0.613   | 8         |
| KCNMA1      | potassium calcium-activated channel subfamily M alpha 1 | 6.16        | 0.001   | 0.399   | 4         |
| COL28A1     | collagen type XXVIII alpha 1 chain                      | 5.27        | 0.002   | 0.455   | 7         |
| GARNL3      | GTPase activating Rap/RanGAP domain like 3              | 4.95        | 0.002   | 0.472   | 11        |
| COL11A1     | collagen type XI alpha 1 chain                          | 4.80        | 0.008   | 0.607   | 7         |
| NFASC       | neurofascin                                             | 4.25        | 0.001   | 0.455   | 5         |
| BMPR1B      | bone morphogenetic protein receptor type 1B             | 4.16        | 0.000   | 0.209   | 3         |
| CYP1A1      | cytochrome P450 family 1 subfamily A member 1           | 3.87        | 0.005   | 0.548   | 8         |
| MRAP2       | melanocortin 2 receptor accessory protein 2             | 3.63        | 0.004   | 0.548   | 5         |
| KRT18       | keratin 18                                              | 3.60        | 0.003   | 0.499   | 1         |
| COLGALT2    | collagen beta(1-O)galactosyltransferase 2               | 3.32        | 0.003   | 0.527   | 12        |
| ADIRF       | adipogenesis regulatory factor                          | 3.21        | 0.006   | 0.559   | 12        |
| SHISA2      | shisa family member 2                                   | 2.99        | 0.005   | 0.548   | 8         |
| CNKSR2      | connector enhancer of kinase suppressor of Ras 2        | 2.88        | 0.005   | 0.548   | 11        |
| KRT19       | keratin 19                                              | 2.70        | 0.007   | 0.600   | 1         |
| ZBTB7C      | zinc finger and BTB domain containing 7C                | 2.67        | 0.000   | 0.091   | 1         |
| PLP1        | proteolipid protein 1                                   | 2.66        | 0.003   | 0.515   | 7         |
| EPHA7       | EPH receptor A7                                         | 2.50        | 0.008   | 0.607   | 4         |
| WISP1       | WNT1 inducible signaling pathway protein 1              | 2.49        | 0.008   | 0.607   | 2         |
| KLF5        | Kruppel like factor 5                                   | 2.47        | 0.000   | 0.261   | 8         |
| KERA        | keratocan                                               | 2.35        | 0.010   | 0.643   | 2         |
| KCNT2       | potassium sodium-activated channel subfamily T member 2 | 2.33        | 0.003   | 0.548   | 7         |
| MYBL1       | MYB proto-oncogene like 1                               | 2.28        | 0.010   | 0.644   | 6         |
| GRIP2       | glutamate receptor interacting protein 2                | 2.18        | 0.005   | 0.548   | 7         |
| EGFL6       | EGF like domain multiple 6                              | 2.12        | 0.009   | 0.638   | 4         |
| PODNL1      | podocan like 1                                          | 2.12        | 0.010   | 0.643   | 9         |
| PON3        | paraoxonase 3                                           | 2.08        | 0.007   | 0.586   | 4         |
| CA11        | carbonic anhydrase 11                                   | 2.06        | 0.008   | 0.607   | 6         |
| RPL15       | ribosomal protein L15                                   | 2.03        | 0.005   | 0.548   | 11        |
| MMP16       | matrix metalloproteinase 16                             | 2.03        | 0.003   | 0.499   | 2         |
| SYNC        | syncoilin, intermediate filament protein                | 1.99        | 0.001   | 0.455   | 4         |
| CHN1        | chimerin 1                                              | 1.98        | 0.007   | 0.580   | 3         |
| KANK4       | KN motif and ankyrin repeat domains 4                   | 1.90        | 0.002   | 0.499   | -         |
| NOV         | nephroblastoma overexpressed                            | 1.89        | 0.002   | 0.499   | 2         |
| CADM3       | cell adhesion molecule 3                                | 1.84        | 0.000   | 0.186   | 4         |
| ADGRG2      | adhesion G protein-coupled receptor G2                  | 1.81        | 0.004   | 0.548   | 7,12      |
| CEP126      | centrosomal protein 126                                 | 1.80        | 0.007   | 0.607   | 12        |
| PIWIL4      | piwi like RNA-mediated gene silencing 4                 | 1.80        | 0.008   | 0.607   | 5         |

|          |                                                           |      |       |       |        |
|----------|-----------------------------------------------------------|------|-------|-------|--------|
| RARB     | retinoic acid receptor beta                               | 1.77 | 0.000 | 0.217 | 2      |
| ROBO2    | roundabout guidance receptor 2                            | 1.74 | 0.009 | 0.615 | 1      |
| AMPH     | amphiphysin                                               | 1.73 | 0.009 | 0.613 | 3      |
| MAP6     | microtubule associated protein 6                          | 1.73 | 0.009 | 0.638 | 2      |
| CFI      | complement factor I                                       | 1.71 | 0.006 | 0.563 | 9      |
| EXPH5    | exophilin 5                                               | 1.69 | 0.005 | 0.548 | 10     |
| SEMA3D   | semaphorin 3D                                             | 1.67 | 0.002 | 0.472 | 1      |
| SYNM     | synemin                                                   | 1.65 | 0.001 | 0.399 | 1      |
| PRKG1    | protein kinase, cGMP-dependent, type I                    | 1.65 | 0.001 | 0.449 | 3      |
| PLCE1    | phospholipase C epsilon 1                                 | 1.63 | 0.000 | 0.091 | 2      |
| GALNT5   | polypeptide N-acetylgalactosaminyltransferase 5           | 1.62 | 0.002 | 0.499 | 12     |
| SGSM1    | small G protein signaling modulator 1                     | 1.62 | 0.000 | 0.091 | 10     |
| CFHR3    | complement factor H related 3                             | 1.60 | 0.000 | 0.267 | 14     |
| EPB41L2  | erythrocyte membrane protein band 4.1 like 2              | 1.58 | 0.001 | 0.455 | 1      |
| MET      | MET proto-oncogene, receptor tyrosine kinase              | 1.57 | 0.001 | 0.397 | 3      |
| SLC7A10  | solute carrier family 7 member 10                         | 1.57 | 0.002 | 0.499 | 11     |
| SEMA3C   | semaphorin 3C                                             | 1.57 | 0.002 | 0.499 | 1      |
| NECAB3   | N-terminal EF-hand calcium binding protein 3              | 1.56 | 0.005 | 0.548 | 5      |
| DPYSL3   | dihydropyrimidinase like 3                                | 1.53 | 0.007 | 0.607 | 11     |
| CDC42BPG | CDC42 binding protein kinase gamma                        | 1.52 | 0.009 | 0.634 | 14     |
| RFTN2    | raftlin family member 2                                   | 1.52 | 0.000 | 0.000 | 9      |
| CFB      | complement factor B                                       | 1.52 | 0.008 | 0.607 | 6      |
| SPARCL1  | SPARC like 1                                              | 1.49 | 0.005 | 0.548 | 10     |
| C14orf93 | chromosome 14 open reading frame 93                       | 1.48 | 0.009 | 0.617 | 5      |
| ZNF180   | zinc finger protein 180                                   | 1.47 | 0.006 | 0.570 | 11     |
| NUDT22   | nudix hydrolase 22                                        | 1.47 | 0.000 | 0.166 | 11     |
| PLEKHA4  | pleckstrin homology domain containing A4                  | 1.47 | 0.002 | 0.472 | 12     |
| ABCB1    | ATP binding cassette subfamily B member 1                 | 1.47 | 0.001 | 0.399 | 6      |
| DCLRE1A  | DNA cross-link repair 1A                                  | 1.46 | 0.008 | 0.612 | 11     |
| CLU      | clusterin                                                 | 1.46 | 0.005 | 0.548 | 4      |
| ITGB8    | integrin subunit beta 8                                   | 1.45 | 0.005 | 0.548 | 1      |
| MYO1D    | myosin ID                                                 | 1.44 | 0.005 | 0.548 | 6      |
| C15orf41 | chromosome 15 open reading frame 41                       | 1.44 | 0.008 | 0.607 | 9      |
| CCNE2    | cyclin E2                                                 | 1.44 | 0.004 | 0.548 | 3      |
| ADAMTSL3 | ADAMTS like 3                                             | 1.44 | 0.003 | 0.499 | 11     |
| CD109    | CD109 molecule                                            | 1.41 | 0.002 | 0.464 | 10     |
| SNORA62  | small nucleolar RNA, H/ACA box 62                         | 1.41 | 0.008 | 0.607 | 15     |
| NCKAP5   | NCK associated protein 5                                  | 1.39 | 0.006 | 0.578 | 5      |
| PCDH11X  | protocadherin 11 X-linked                                 | 1.38 | 0.005 | 0.548 | 14     |
| NAALADL2 | N-acetylated alpha-linked acidic dipeptidase like 2       | 1.38 | 0.001 | 0.441 | 5      |
| GPC6     | glypican 6                                                | 1.37 | 0.007 | 0.592 | 9      |
| CEP162   | centrosomal protein 162                                   | 1.37 | 0.010 | 0.644 | 10     |
| RGS5     | regulator of G protein signaling 5                        | 1.37 | 0.002 | 0.472 | 2      |
| AFF3     | AF4/FMR2 family member 3                                  | 1.37 | 0.006 | 0.573 | 12     |
| ANGPTL1  | angiopoietin like 1                                       | 1.36 | 0.005 | 0.548 | 1      |
| ADAMTS6  | ADAM metalloproteinase with thrombospondin type 1 motif 6 | 1.36 | 0.002 | 0.472 | 7      |
| GLIS2    | GLIS family zinc finger 2                                 | 1.36 | 0.005 | 0.548 | 3      |
| ZFPM2    | zinc finger protein, FOG family member 2                  | 1.36 | 0.004 | 0.548 | 1      |
| SEMA3B   | semaphorin 3B                                             | 1.35 | 0.005 | 0.548 | 1      |
| COL14A1  | collagen type XIV alpha 1 chain                           | 1.35 | 0.001 | 0.455 | 5      |
| PRTFDC1  | phosphoribosyl transferase domain containing 1            | 1.34 | 0.008 | 0.607 | 14     |
| PLA2G4A  | phospholipase A2 group IVA                                | 1.33 | 0.005 | 0.548 | 4      |
| FAM129A  | family with sequence similarity 129 member A              | 1.32 | 0.003 | 0.499 | 14     |
| PLOD2    | procollagen-lysine,2-oxoglutarate 5-dioxygenase 2         | 1.31 | 0.005 | 0.548 | 2      |
| ADD3     | adducin 3                                                 | 1.31 | 0.000 | 0.091 | 4      |
| MAP1A    | microtubule associated protein 1A                         | 1.30 | 0.006 | 0.556 | 2,5,12 |
| C18orf21 | chromosome 18 open reading frame 21                       | 1.30 | 0.006 | 0.574 | 5      |
| NREP     | neuronal regeneration related protein                     | 1.29 | 0.008 | 0.607 | 3      |

|          |                                                                    |       |       |       |       |
|----------|--------------------------------------------------------------------|-------|-------|-------|-------|
| SSPN     | sarcospan                                                          | 1.29  | 0.000 | 0.221 | 2     |
| NTN4     | netrin 4                                                           | 1.28  | 0.002 | 0.455 | 2     |
| RFC3     | replication factor C subunit 3                                     | 1.28  | 0.006 | 0.561 | 13    |
| CHL1     | cell adhesion molecule L1 like                                     | 1.28  | 0.005 | 0.548 | 9     |
| ABCA8    | ATP binding cassette subfamily A member 8                          | 1.27  | 0.008 | 0.607 | 9     |
| CARF     | calcium responsive transcription factor                            | 1.26  | 0.005 | 0.548 | 5     |
| TGFB2    | transforming growth factor beta 2                                  | 1.25  | 0.010 | 0.643 | 1     |
| ZBTB37   | zinc finger and BTB domain containing 37                           | 1.24  | 0.005 | 0.548 | 9     |
| ERCC6L2  | ERCC excision repair 6 like 2                                      | 1.23  | 0.005 | 0.548 | 11    |
| KDEL3    | KDEL endoplasmic reticulum protein retention receptor 3            | 1.21  | 0.006 | 0.580 | 8     |
| NBAS     | neuroblastoma amplified sequence                                   | 1.21  | 0.003 | 0.545 | 9     |
| ADNP2    | ADNP homeobox 2                                                    | 1.21  | 0.008 | 0.607 | 10    |
| SYDE2    | synapse defective Rho GTPase homolog 2                             | 1.20  | 0.002 | 0.455 | 10    |
| NAPA     | NSF attachment protein alpha                                       | -1.15 | 0.009 | 0.615 | 8     |
| ELMO2    | engulfment and cell motility 2                                     | -1.15 | 0.002 | 0.499 | 5     |
| NCLN     | nicalin                                                            | -1.15 | 0.009 | 0.617 | 10    |
| ETV6     | ETS variant 6                                                      | -1.18 | 0.010 | 0.643 | 1     |
| STK35    | serine/threonine kinase 35                                         | -1.18 | 0.004 | 0.548 | 3     |
| AHCYL1   | adenosylhomocysteinase like 1                                      | -1.19 | 0.007 | 0.607 | 3     |
| HGSNAT   | heparan-alpha-glucosaminide N-acetyltransferase                    | -1.19 | 0.005 | 0.548 | -     |
| TNFRSF1B | TNF receptor superfamily member 1B                                 | -1.19 | 0.005 | 0.548 | 6     |
| ZDHHC5   | zinc finger DHHC-type containing 5                                 | -1.19 | 0.003 | 0.499 | 12    |
| IRAK1    | interleukin 1 receptor associated kinase 1                         | -1.20 | 0.006 | 0.565 | 13    |
| CIC      | capicua transcriptional repressor                                  | -1.20 | 0.004 | 0.548 | 12    |
| RIPK3    | receptor interacting serine/threonine kinase 3                     | -1.20 | 0.009 | 0.617 | 6     |
| SLC6A8   | solute carrier family 6 member 8                                   | -1.20 | 0.008 | 0.607 | 4     |
| TGFB1    | transforming growth factor beta 1                                  | -1.21 | 0.010 | 0.640 | 3     |
| UBE2J2   | ubiquitin conjugating enzyme E2 J2                                 | -1.21 | 0.002 | 0.464 | 1     |
| FZD4     | frizzled class receptor 4                                          | -1.21 | 0.001 | 0.399 | 7     |
| EDNRB    | endothelin receptor type B                                         | -1.22 | 0.003 | 0.515 | 7     |
| RAB32    | RAB32, member RAS oncogene family                                  | -1.22 | 0.002 | 0.472 | 8     |
| POGK     | pogo transposable element derived with KRAB domain                 | -1.22 | 0.005 | 0.548 | 13    |
| HEXIM1   | hexamethylene bisacetamide inducible 1                             | -1.23 | 0.003 | 0.545 | 8     |
| UBN1     | ubiquitin 1                                                        | -1.23 | 0.004 | 0.548 | 8     |
| PPP1R10  | protein phosphatase 1 regulatory subunit 10                        | -1.23 | 0.003 | 0.499 | 13    |
| MAN1C1   | mannosidase alpha class 1C member 1                                | -1.23 | 0.003 | 0.548 | 10    |
| S1PR1    | sphingosine-1-phosphate receptor 1                                 | -1.24 | 0.005 | 0.548 | 7     |
| LSM6     | LSM6 homolog, U6 small nuclear RNA and mRNA degradation associated | -1.25 | 0.008 | 0.607 | 5     |
| ARHGEF15 | Rho guanine nucleotide exchange factor 15                          | -1.25 | 0.009 | 0.638 | 11    |
| C11orf84 | chromosome 11 open reading frame 84                                | -1.25 | 0.005 | 0.548 | 5     |
| AP1B1    | adaptor related protein complex 1 beta 1 subunit                   | -1.25 | 0.003 | 0.499 | 2     |
| VWF      | von Willebrand factor                                              | -1.25 | 0.005 | 0.548 | 2     |
| MED26    | mediator complex subunit 26                                        | -1.26 | 0.003 | 0.499 | 8     |
| ORAI3    | ORAI calcium release-activated calcium modulator 3                 | -1.26 | 0.006 | 0.569 | 13    |
| MAFB     | MAF bZIP transcription factor B                                    | -1.27 | 0.002 | 0.472 | 4     |
| ITGAM    | integrin subunit alpha M                                           | -1.28 | 0.006 | 0.567 | 13    |
| SSH2     | slingshot protein phosphatase 2                                    | -1.29 | 0.010 | 0.643 | 10,13 |
| JMJD6    | arginine demethylase and lysine hydroxylase                        | -1.29 | 0.008 | 0.607 | 6     |
| FOSL2    | FOS like 2, AP-1 transcription factor subunit                      | -1.29 | 0.001 | 0.399 | 4     |
| PACS1    | phosphofurin acidic cluster sorting protein 1                      | -1.30 | 0.008 | 0.607 | 2     |
| NLRP3    | NLR family pyrin domain containing 3                               | -1.30 | 0.002 | 0.499 | 13    |
| LMNB2    | lamin B2                                                           | -1.30 | 0.003 | 0.515 | 8     |
| CDC42EP4 | CDC42 effector protein 4                                           | -1.31 | 0.000 | 0.223 | 3     |
| GTF2IRD1 | GTF2I repeat domain containing 1                                   | -1.31 | 0.010 | 0.640 | 13    |
| AHCY     | adenosylhomocysteinase                                             | -1.31 | 0.000 | 0.136 | 3     |
| GPER1    | G protein-coupled estrogen receptor 1                              | -1.32 | 0.004 | 0.548 | 7     |
| STAB1    | stabilin 1                                                         | -1.33 | 0.006 | 0.556 | 4     |
| BAG3     | BCL2 associated athanogene 3                                       | -1.33 | 0.000 | 0.166 | 10    |

|          |                                                           |       |       |       |     |
|----------|-----------------------------------------------------------|-------|-------|-------|-----|
| ETS2     | ETS proto-oncogene 2, transcription factor                | -1.33 | 0.003 | 0.499 | 1   |
| PIM2     | Pim-2 proto-oncogene, serine/threonine kinase             | -1.34 | 0.006 | 0.573 | 4   |
| BTG2     | BTG anti-proliferation factor 2                           | -1.34 | 0.008 | 0.607 | 3   |
| CLCN4    | chloride voltage-gated channel 4                          | -1.35 | 0.007 | 0.600 | 9   |
| VEGFA    | vascular endothelial growth factor A                      | -1.35 | 0.000 | 0.221 | 3   |
| ITPRIP   | inositol 1,4,5-trisphosphate receptor interacting protein | -1.36 | 0.000 | 0.166 | 9   |
| USP31    | ubiquitin specific peptidase 31                           | -1.37 | 0.004 | 0.548 | 9   |
| DAGLB    | diacylglycerol lipase beta                                | -1.38 | 0.005 | 0.548 | 14  |
| HSD17B14 | hydroxysteroid 17-beta dehydrogenase 14                   | -1.38 | 0.005 | 0.548 | 11  |
| CTPS1    | CTP synthase 1                                            | -1.38 | 0.009 | 0.616 | 8   |
| PLXNA4   | plexin A4                                                 | -1.38 | 0.007 | 0.599 | 12  |
| LPAR2    | lysophosphatidic acid receptor 2                          | -1.39 | 0.007 | 0.603 | 7   |
| IFNAR2   | interferon alpha and beta receptor subunit 2              | -1.39 | 0.005 | 0.548 | 6   |
| PLIN2    | perilipin 2                                               | -1.40 | 0.000 | 0.262 | 1   |
| ITPKC    | inositol-trisphosphate 3-kinase C                         | -1.42 | 0.004 | 0.548 | 14  |
| NFIL3    | nuclear factor, interleukin 3 regulated                   | -1.42 | 0.003 | 0.499 | 6   |
| AMY1C    | amylase, alpha 1C (salivary)                              | -1.42 | 0.007 | 0.585 | 6   |
| NKG7     | natural killer cell granule protein 7                     | -1.42 | 0.001 | 0.350 | 13  |
| CLIC5    | chloride intracellular channel 5                          | -1.43 | 0.004 | 0.548 | 6   |
| SLC25A25 | solute carrier family 25 member 25                        | -1.44 | 0.006 | 0.556 | 14  |
| MRC1     | mannose receptor C-type 1                                 | -1.45 | 0.007 | 0.585 | 3   |
| DYSF     | dysferlin                                                 | -1.45 | 0.003 | 0.515 | 8   |
| SLC6A6   | solute carrier family 6 member 6                          | -1.45 | 0.002 | 0.472 | 4   |
| HYAL2    | hyaluronoglucosaminidase 2                                | -1.45 | 0.005 | 0.548 | 6   |
| LNx1     | ligand of numb-protein X 1                                | -1.45 | 0.004 | 0.548 | 5   |
| SELL     | selectin L                                                | -1.46 | 0.004 | 0.548 | 6   |
| PKHD1    | PKHD1, fibrocystin/polyductin                             | -1.48 | 0.009 | 0.617 | 1   |
| ANPEP    | alanyl aminopeptidase, membrane                           | -1.49 | 0.002 | 0.499 | 1   |
| LRRC8D   | leucine rich repeat containing 8 VRAC subunit D           | -1.52 | 0.000 | 0.261 | 10  |
| C5AR1    | complement C5a receptor 1                                 | -1.52 | 0.004 | 0.548 | 7   |
| TNFSF9   | TNF superfamily member 9                                  | -1.59 | 0.007 | 0.586 | 6   |
| DUSP2    | dual specificity phosphatase 2                            | -1.60 | 0.001 | 0.336 | 4   |
| STS      | steroid sulfatase                                         | -1.60 | 0.008 | 0.607 | 8   |
| MS4A7    | membrane spanning 4-domains A7                            | -1.62 | 0.004 | 0.548 | 16  |
| SLC6A2   | solute carrier family 6 member 2                          | -1.64 | 0.004 | 0.548 | 1   |
| UNC5A    | unc-5 netrin receptor A                                   | -1.65 | 0.006 | 0.561 | 7   |
| P2RY1    | purinergic receptor P2Y1                                  | -1.66 | 0.000 | 0.267 | 7   |
| SULT2A1  | sulfotransferase family 2A member 1                       | -1.68 | 0.002 | 0.472 | 1   |
| AHSA2    | activator of HSP90 ATPase homolog 2                       | -1.68 | 0.005 | 0.548 | 5   |
| RPH3A    | rabphilin 3A                                              | -1.70 | 0.001 | 0.379 | 12  |
| CBFA2T3  | CBFA2/RUNX1 translocation partner 3                       | -1.71 | 0.002 | 0.499 | 1   |
| ADORA3   | adenosine A3 receptor                                     | -1.73 | 0.000 | 0.091 | 7   |
| CSF3R    | colony stimulating factor 3 receptor                      | -1.87 | 0.001 | 0.420 | 1   |
| OSM      | oncostatin M                                              | -1.88 | 0.005 | 0.548 | 3   |
| NLRP12   | NLR family pyrin domain containing 12                     | -2.24 | 0.000 | 0.221 | 13  |
| TXK      | TXK tyrosine kinase                                       | -2.26 | 0.008 | 0.607 | 2   |
| TREH     | trehalase                                                 | -2.28 | 0.007 | 0.607 | 9   |
| TEX33    | testis expressed 33                                       | -2.72 | 0.001 | 0.399 | 5   |
| LTF      | lactotransferrin                                          | -2.85 | 0.002 | 0.455 | 1   |
| FAT2     | FAT atypical cadherin 2                                   | -2.93 | 0.009 | 0.628 | 10  |
| MMP8     | matrix metalloproteinase 8                                | -3.23 | 0.000 | 0.133 | 2   |
| AKR1C4   | aldo-keto reductase family 1 member C4                    | -3.59 | 0.002 | 0.455 | 4,9 |
| SRXN1    | sulfiredoxin 1                                            | -3.85 | 0.000 | 0.091 | 6   |

\*Network ID's are presented in Table S4
