# Supplementary material for: Transcriptome analysis of adipose tissue from pigs divergent in feed efficiency reveals alteration in gene networks related to adipose growth, lipid metabolism, extracellular matrix, and immune response
Source: Springer Nature journal article supplement (doi:10.1007/s00438-018-1515-5), 2018-11-27
Supplement: 438_2018_1515_MOESM5_ESM.pdf [file 438_2018_1515_MOESM5_ESM.pdf]

Article title: Transcriptome analysis of adipose tissue from pigs divergent in feed efficiency reveals alteration in gene networks related to adipose growth, lipid metabolism, extracellular matrix and immune response

Journal name: Molecular Genetics and Genomics

Authors: Justyna Horodyska<sup>1,2</sup>, Henry Reyer<sup>2</sup>, Klaus Wimmers<sup>2,3</sup>, Nares Trakooljul<sup>2</sup>, Peadar G. Lawlor<sup>4</sup>, Ruth M. Hamill<sup>1\*</sup>

<sup>1</sup>Teagasc, Food Research Centre, Ashtown, Dublin 15, Ireland

<sup>2</sup>Leibniz Institute for Farm Animal Biology (FBN), Institute for Genome Biology, Dummerstorf, Germany

<sup>3</sup>Faculty of Agricultural and Environmental Sciences, University Rostock, Germany

<sup>4</sup>Teagasc, Pig Development Department, AGRIC, Moorepark, Fermoy, Co. Cork, Ireland

\*Corresponding author: Ruth.Hamill@teagasc.ie

**Table S4** List of networks inferred by integration of genes affected by feed efficiency.

| ID | Molecules in Network                                                                                                                                                                                                                                                                                                                              | Top Diseases and Functions                                                                                     |
|----|---------------------------------------------------------------------------------------------------------------------------------------------------------------------------------------------------------------------------------------------------------------------------------------------------------------------------------------------------|----------------------------------------------------------------------------------------------------------------|
| 1  | Akt, ANGPTL1, ANPEP, CBFA2T3, CSF3R, Cytokeratin, EPB41L2, estrogen receptor, ETS2, ETV6, Hdac, ITGB8, KRT18, KRT19, LTF, N-cor, Nfat (family), PKHD1, PLIN2, Raf, ROBO2, Rxr, Sema3, SEMA3B, SEMA3C, SEMA3D, SLC6A2, SULT2A1, SYNM, TCF, TGFB2, UBE2J2, VitaminD3-VDR-RXR, ZBTB7C, ZFPM2                                                         | Cell death and survival, embryonic development, cancer                                                         |
| 2  | Adaptor protein 1, Ap1 gamma, APIB1, COL11A2, Collagen type I, Collagen type II, Collagen type III, Collagen type IV, Collagen(s), Cpla2, Cr3, elastase, ERK1/2, Fc gamma receptor, Fibrin, KERA, Laminin, MAP6, MAP1A, MHC Class I (complex), MMP8, MMP16, NOV, NTN4, PACS1, PLCE1, PLOD2, RARB, RGS5, SMAD1/5, Smad1/5/8, SSPN, TXK, VWF, WISP1 | Connective tissue development and function, connective tissue disorders, organismal injury and abnormalities   |
| 3  | AHCY, AHCYL1, Alp, AMPH, BMPR1B, BTG2, c-Src, C/ebp, CCNE2, Cdc2, CDC42EP4, CHN1, Collagen Alpha1, Cyclin A, Cyclin E, E2f, Fcgr1, GLIS2, Gm-csf, GTPase, Jnk, MET, MRC1, NREP, OSM, PLC gamma, PLEKHB1, PRKG1, Rb, Smad, Smad2/3, STK35, Tgf beta, TGFB1, VEGFA                                                                                  | Organ development, respiratory system development and function, cardiovascular system development and function |
| 4  | ADD3, AKR1C4, Alpha 1 antitrypsin, AMPK, CADM3, CLU, creatine kinase, cytochrome C, DUSP2, EGFL6, EPHA7, ERK, Fibrinogen, FOSL2, Glycoprotein 1B, HDL, KCNMA1, LDL, LDL-cholesterol, MAFB, NADPH oxidase, p70 S6k, PDGF BB, PIM2, PLA2G4A, Pld, PON3, PRKAA, Pro-inflammatory Cytokine, Rock, SLC6A6, SLC6A8, STAB1, STAT5a/b, SYNC               | Glomerular injury, organismal injury and abnormalities, renal fibrosis                                         |
| 5  | AHSA2, APH1B, APP, C11orf84, C14orf93, C18orf21, CARF, CDK14, CNTNAP1, COL14A1, DNAJB14, DNAJC4, DYNC1LI2, EBF4, ELMO2, ENO3, F11, FN3KRP, GRB2, HSP90AA1, KIF5A, LNX1, LSM6, MAP1A, MRAP2, MYL1, NAALADL2, NADK, NCKAP5, NECAB3, NFASC, PIWIL4, TEX33, USP12, YWHAЕ                                                                              | Cardiovascular disease, organismal injury and abnormalities, cancer                                            |
| 6  | ABCB1, Alpha Actinin, AMY1C (includes others), BCR (complex), CA11, CFB, CLIC5, Fcgr3, GOT, hemoglobin, HYAL2, IFNAR2, Iga, Ige, IgG, IgG1, Igg3, IgG2a, Igm, Ikb, IL12 (complex), Immunoglobulin, JMJD6, Ldh (complex), MHC Class II (complex), MHC II, MYBL1, MYO1D, NFIL3, NFkB (complex), RIPK3, SELL, SRXN1, TNFRSF1B, TNFSF9                | Humoral immune response, protein synthesis, antimicrobial response                                             |
| 7  | ADAMTS6, Adaptor protein 2, ADCY, ADGRG2, ADORA3, C5AR1, Calmodulin, Cg, COL11A1, COL28A1, collagen, EDNRB, FSH, FZD4, G protein alpha1, Gpcr, GPER1, GRIP2, Gsk3, IL12 (family), Integrin, KCNT2, LPAR2, Metalloprotease, Mmp, MTORC1, P2RY1, p85 (pik3r), Pkc(s), PLC, PLP1, Rac, S1PR1, UNC5A, voltage-gated calcium channel                   | Cell signalling, cellular function and maintenance, vitamin and mineral metabolism                             |

|    |                                                                                                                                                                                                                                                                                                                                              |                                                                                                            |
|----|----------------------------------------------------------------------------------------------------------------------------------------------------------------------------------------------------------------------------------------------------------------------------------------------------------------------------------------------|------------------------------------------------------------------------------------------------------------|
| 8  | Alpha tubulin, Ap1, CTPS1, CYP1A1, DIRAS3, DYSF, Focal adhesion kinase, HEXIM1, Histone h3, Histone h4, Insulin, KDELR3, KLF5, Lh, LMNB2, Mapk, MED26, NAPA, P38 MAPK, Pdgf (complex), Pka, Pka catalytic subunit, Proinsulin, RAB32, Ras, Ras homolog, RNA polymerase II, SHISA2, Sos, SRC (family), STS, Tnf (family), trypsin, UBN1, Vegf | Cellular development, cellular growth and proliferation, dermatological diseases and conditions            |
| 9  | ABCA8, ACO2, AKR1C4, ARL4C, C15orf41, CFI, CHL1, CLCN4, D-glucose, F11, GOT1, GPC6, HIST1H3A, HMGN4, HNF4A, ITPRIP, JUN, NBAS, NUPR1, ONECUT1, PFKFB4, PODNLI, RAB38, RASSF1, RFTN2, SERPINB8, SLC16A6, SMARCA4, SPINK1, SUCLA2, TREH, TRMT12, USP31, VRK1, ZBTB37                                                                           | Cell morphology, cellular function and maintenance, drug metabolism                                        |
| 10 | ADNP2, AGPAT1, AIF1L, BAG3, CD109, CEP162, CFD, DHRS3, ELAVL1, EXPH5, FAM107B, FAT2, GCA, LRRC8A, LRRC8C, LRRC8D, MAN1C1, MC1R, MUM1, NCLN, NR4A2, PAIP2, PKN2, RAB2B, SGSM1, SNN, SPARC, SPARCL1, SSH2, SYDE2, SYNPO, TMEM207, TNF, ZCCHC14, ZMPSTE24                                                                                       | Cell-to-cell signalling and interaction, inflammatory response, cell cycle                                 |
| 11 | ADAMTSL3, AES, ALAD, ANKRA2, ARHGEF15, ATP6V0D1, BYSL, CNKSR2, DCLRE1A, DLGAP2, DPYSL3, DPYSL5, ERCC6L2, FAM124B, GARNL3, HPCAL1, HSD17B14, JOSD1, KRTAP10-3, LRRC7, MAGI2, NEK6, NUDT22, RPL12, RPL15, SLC3A2, SLC7A10, TNIP3, TRIM28, UBC, ZNF124, ZNF180, ZNF202, ZNF250, ZNF707                                                          | Amino acid metabolism, molecular transport, small molecule biochemistry                                    |
| 12 | ADGRG2, ADIRF, AFF3, beta-estradiol, C1QTNF3, CEP126, CIC, COLGALT2, Endophilin, ETVB, EXT2, FGFR1, GALNT5, GLO1, GOLGA7B, HTT, INA, LDHB, MAP1A, Nefm, NTRK1, ODF2L, PDHA1, PIK3R4, PLEKHA4, PLXNA4, PYGB, RPH3A, SNCA, SSTR5, SUCLA2, TMEM255A, TPI1, TPP2, ZDHHC5                                                                         | Cell death and survival, developmental disorder, embryonic development                                     |
| 13 | 26s Proteasome, Actin, Alpha catenin, CaMKII, caspase, CD3, Cofilin, Creb, F Actin, GTF2IRD1, Hsp70, Hsp90, IFN Beta, IL1, Interferon alpha, IRAK1, ITGAM, MAP2K1/2, Mek, MHC CLASS I (family), NKG7, NLRP3, NLRP12, ORAI3, P glycoprotein, PI3K (complex), POGK, PP2A, PPP1R10, Rap1, RFC3, SSH2, STAT, TCR, Ubiquitin                      | Dermatological diseases and conditions, hereditary disorder, inflammatory disease                          |
| 14 | AMPD3, arachidonic acid, BPIFA1, CDC42BPG, CFHR3, chondroitin sulfate A, Ck2, DAGLB, DSG3, FAM129A, FBXW5, FGFR4, FOS, Hbb-b2, heparin, HISTONE, IL16, IL1B, ITPKC, KRT6B, LRPAP1, MC4R, NFKBIA, NKIRAS1, NMB, NPS, PCDH11X, Protamine, PRTFDC1, PTGFR, PTP4A1, RAC1, SERPIND1, SLC25A25, spermidine                                         | Cardiovascular disease, cardiovascular system development and function, cell morphology                    |
| 15 | DKC1, SNORA62                                                                                                                                                                                                                                                                                                                                | DNA replication, recombination, and repair, dermatological diseases and conditions, developmental disorder |
| 16 | HMGCL, MS4A7, SLC35F6                                                                                                                                                                                                                                                                                                                        | Developmental disorder, hereditary disorder, metabolic disease                                             |
